# Supplementary material for: Halogen anions (F−, Cl−, Br−) modulated the localized microstructure of g-C3N4 to facilitate charge separation and transport and enhance photocatalytic activities
Source: Royal Society of Chemistry journal article supplement (doi:10.1039/d4cy00643g), 2024-01-01
Supplement: d4cy00643g1.pdf [file d4cy00643g1.pdf]

Supporting information for

**Halogen Aions (F<sup>-</sup>, Cl<sup>-</sup>, Br<sup>-</sup>) Modulated Localized Microstructure of  
g-C<sub>3</sub>N<sub>4</sub> to Facilitate Charge Separation and Transport and Enhance  
Photocatalytic Activities**

Xiaogang Liu <sup>a, b\*</sup>, Mengyu Chen <sup>a</sup>, Xin Zhang <sup>a</sup>

<sup>a</sup> College of Chemistry and Chemical Engineering, Xinyang Normal University,  
Xinyang 464000, China;

<sup>b</sup> Xinyang Key Laboratory of Low-Carbon Energy Materials, Xinyang 464000, China;

<sup>c</sup> Henan Province Key Laboratory of Utilization of Non-Metallic Mineral in the South  
of Henan, Xinyang 464000, China

E-mail: lxg133298@163.com (Xiaogang Liu)

**Table S1.** structural information summary of prepared samples.

| Samples | Surface Area (m <sup>2</sup> g <sup>-1</sup> ) | Pore diameter (nm) | Pore volume (cm <sup>3</sup> /g) |
|---------|------------------------------------------------|--------------------|----------------------------------|
| CN      | 44.86                                          | 30.47              | 0.072                            |
| CN-F    | 45.82                                          | 32.63              | 0.077                            |
| CN-Cl   | 46.34                                          | 25.67              | 0.073                            |
| CN-Br   | 45.14                                          | 30.16              | 0.061                            |

**Table S2.** The relative amounts of various elements in CN, CN-F, CN-Cl and CN-Br based on the XPS (Unit: at. %).

|       | C     | N     | X(F/Cl/Br) | C/N   |
|-------|-------|-------|------------|-------|
| CN    | 44.86 | 55.14 | 0          | 0.814 |
| CN-F  | 45.82 | 53.78 | 0.40       | 0.852 |
| CN-Cl | 46.34 | 53.62 | 0.04       | 0.864 |
| CN-Br | 45.14 | 54.79 | 0.07       | 0.824 |

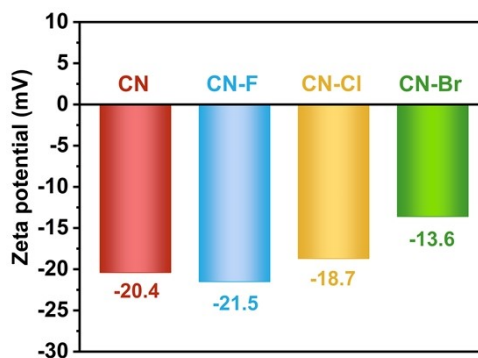

**Figure S1.** The zeta potential of as prepared CN, CN-F, CN-Cl and CN-Br samples.

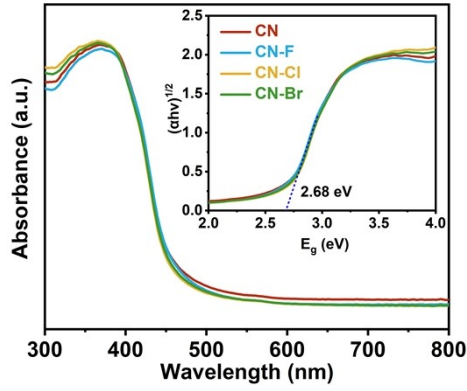

**Figure S2.** The UV-Vis DRS results of CN, CN-F, CN-Cl and CN-Br. (inset is the corresponding Tauc plots).

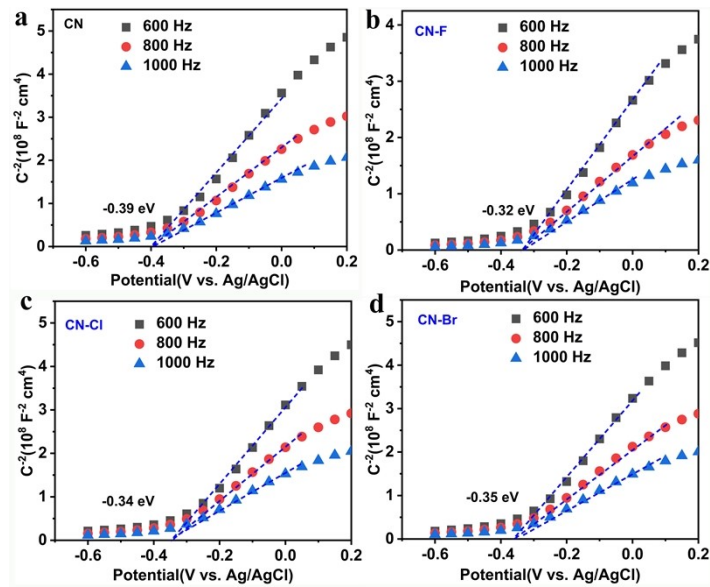

**Figure S3.** Mott-Schottky plots of (a) CN, (b) CN-F, (c) CN-Cl and (d) CN-Br measured at frequencies of 600, 800 and 1000 Hz.

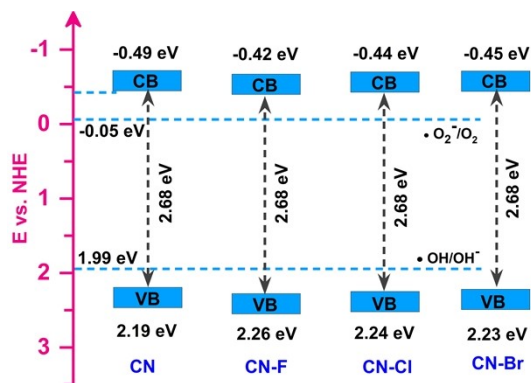

**Figure S4.** As obtained band alignments over CN, CN-F, CN-Cl and CN-Br.

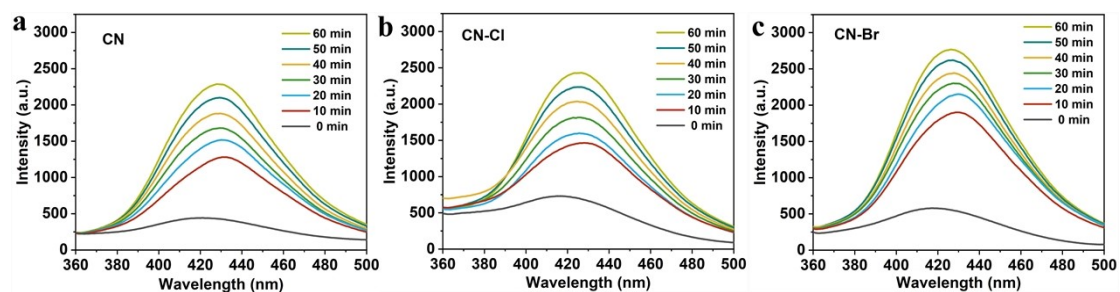

**Figure S5.** Time dependencies of the trapping PL spectra over (a) CN, (b) CN-Cl and (c) CN-Br catalyst in TA solution under visible light irradiation.

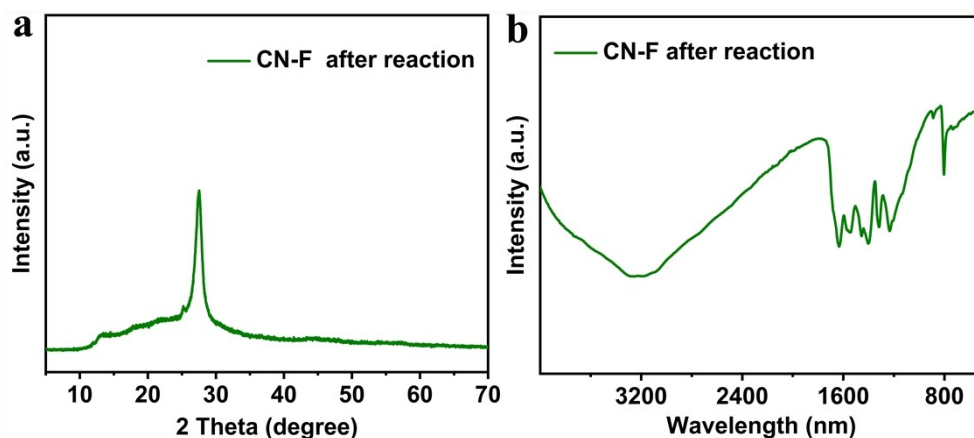

**Figure S6.** (a) XRD patterns and (b) FTIR spectra of used CN-F after catalytic reaction.

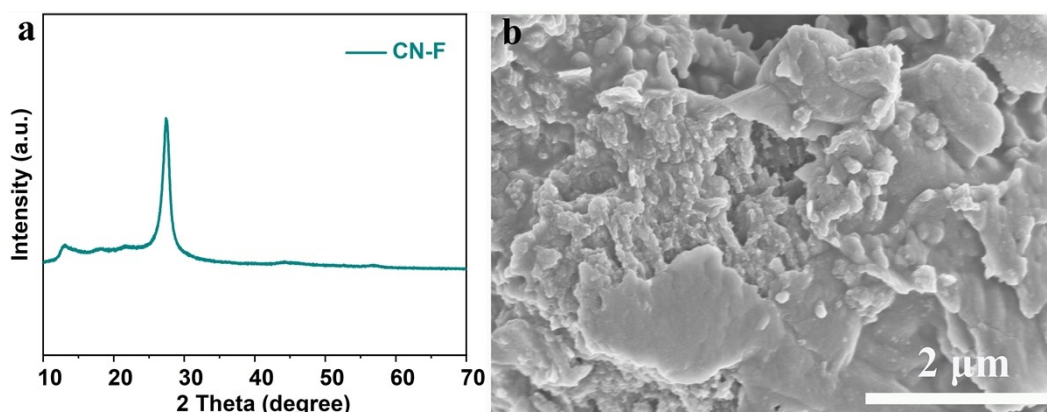

**Figure S7.** (a) XRD patterns and (b) SEM image of CN-F after four consecutive photocatalytic degradation cycles.

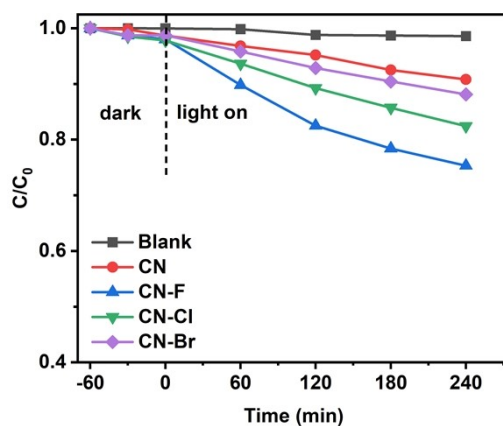

**Figure S8.** Photocatalytic degradation performance of phenol solution (20 mg/L) over as prepared catalysts.

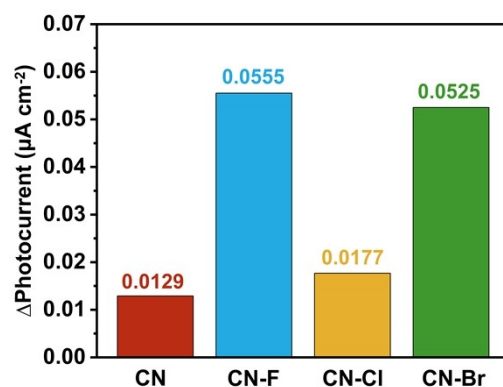

**Figure S9.** Photocurrent density difference ( $\Delta I =$  the steady photocurrent ( $I_p$ ) - the dark photocurrent ( $I_d$ )).

**Table S3.** The fitted EIS results of CN and CN-X.  $R_s$  represents interface resistance and  $R_{ct}$  represents charge transfer resistance.

| Sample | $R_s/\Omega$ | $R_{ct}/\Omega$ |
|--------|--------------|-----------------|
| CN     | 11.78        | 13363           |
| CN-F   | 7.762        | 9220            |
| CN-Cl  | 10.46        | 10363           |
| CN-Br  | 8.068        | 10055           |

**Table S4.** The fitted TRPL results of as prepared CN and CN-X catalysts.

| Catalyst | $\tau_1/\text{ns}$ | $A_1$    | $\tau_2/\text{ns}$ | $A_2$ | $\tau_a/\text{ns}$ |
|----------|--------------------|----------|--------------------|-------|--------------------|
| CN       | 1.834              | 1773.454 | 6.422              | 3.326 | 1.937              |
| CN-F     | 1.979              | 1115.91  | 7.251              | 2.367 | 2.125              |
| CN-Cl    | 1.940              | 1337.606 | 7.342              | 2.134 | 2.060              |
| CN-Br    | 1.945              | 1261.753 | 7.133              | 2.513 | 2.080              |

Additional notes:

The average lifetime ( $\tau_a$ ) value is computed by the following formula:

$$\tau_a = (A_1\tau_1^2 + A_2\tau_2^2)/(A_1\tau_1 + A_2\tau_2)$$

$A_1$  and  $A_2$  represent the amplitude of decay,  $\tau_1$ ,  $\tau_2$  is nonradiative recombination from charge carriers in defective sites and recombination from free excitons within the catalyst, respectively.
